# Supplementary material for: Cascade of submerged reservoirs as a rainfall-runoff model
Source: Copernicus journal article supplement (doi:10.5194/hess-2016-531), 2016-11-09
Supplement: Supplementary file [file hess-2016-531-AC3-supplement.pdf]

$$\begin{aligned}\gamma_{n-1,j} &= \beta_{j,n} \\ \gamma_{n-2,j} &= 2\beta_{j,n} \cdot \gamma_{n-1,j} - \gamma_{n,j}\end{aligned}\tag{17}$$

Hence:

$$\gamma_{n-m,j} = T_m(\beta_{j,n})$$

or

$$5 \quad \gamma_{i,j} = T_{n-i}(\beta_{j,n})$$

Since for Chebyshev polynomials at any values  $p, x$  the following identities are satisfied:

$$T_p(-x) = (-1)^p T_p(x)\tag{19}$$

and

$$T_p(\cos x) = \cos px\tag{20}$$

10 the coefficients  $\gamma_{i,j}$  may be calculated as:

$$\gamma_{i,j} = (-1)^{n-i} \cos\left[(n-i)\frac{2j-1}{2n} \cdot \Pi\right]\tag{21}$$

Finally, the general solution (6) for SC2 yields:

$$Q_i = \sum_{j=1}^n C_j (-1)^{n-i} \cos\left[(n-i)\frac{2j-1}{2n} \cdot \Pi\right] e^{-\left[2+2\cos\left(\frac{2j-1}{2n} \cdot \Pi\right)\right]kt}\tag{22}$$
