# Supplementary material for: Cascade of submerged reservoirs as a rainfall-runoff model
Source: Copernicus journal article supplement (doi:10.5194/hess-2016-531), 2016-11-09
Supplement: Supplementary file [file hess-2016-531-AC5-supplement.pdf]

## ERRATA 2

Page 11, line 4 is:

$$P = \sum_{j=1}^n \cos\left(m \frac{2j-1}{2n} \pi\right) = 0$$

should be:

$$5 \quad B = \sum_{j=1}^n \cos\left(m \frac{2j-1}{2n} \pi\right) = 0$$

Page 12, line 3 is:

$$\sum_{j=1}^n \gamma_{i,j}^2 = \frac{1}{2} (-1)^{2(n-i)} \left\{ \cos\left[(2n-2i) \frac{2j-1}{2n} \pi\right] + \cos(0) \right\} = \frac{n}{2}$$

should be:

$$10 \quad \sum_{j=1}^n \gamma_{i,j}^2 = \frac{1}{2} (-1)^{2(n-i)} \sum_{j=1}^n \left\{ \cos\left[(2n-2i) \frac{2j-1}{2n} \pi\right] + \cos(0) \right\} = \frac{n}{2}$$
